# Supplementary material for: Functional and Structural Insights into the Human PPARα/δ/γ Targeting Preferences of Anti-NASH Investigational Drugs, Lanifibranor, Seladelpar, and Elafibranor
Source: MDPI journal article supplement (doi:10.3390/antiox12081523), 2023-07-29
Supplement: s1 [file s1]

## Supporting Information

### Functional and structural insights into the human PPAR $\alpha$ / $\delta$ / $\gamma$ targeting preferences of anti-NASH investigational drugs, lanifibranor, seladelpar, and elafibranor

Shotaro Kamata<sup>1</sup>, Akihiro Honda<sup>1</sup>, Ryo Ishikawa<sup>1</sup>, Makoto Akahane<sup>1</sup>, Ayane Fujita<sup>1</sup>, Chihiro Kaneko<sup>1</sup>, Saeka Miyawaki<sup>1</sup>, Yuki Habu<sup>1</sup>, Yui Shiiyama<sup>1</sup>, Kie Uchii<sup>1</sup>, Yui Machida<sup>1</sup>, Takuji Oyama<sup>2</sup>, and Isao Ishii<sup>1,\*</sup>

<sup>1</sup>Department of Health Chemistry, Showa Pharmaceutical University, Machida, Tokyo 194-8543, Japan

<sup>2</sup>Faculty of Life and Environmental Sciences, University of Yamanashi, Kofu, Yamanashi 400-8510, Japan

\*Correspondence

#### Contents:

##### Figure S1

Snapshots of the crystals as mounted on the BL5A or BL17A beamline goniometers

##### Figure S2

Other subunit structures of PPAR $\alpha$ / $\delta$  dimers in the cocrystals

##### Table S1

Data collection and refinement statistics (molecular replacement)

##### Table S2 (A separate Excel file)

All PPAR $\alpha$ / $\delta$ / $\gamma$ -LBD amino acids that have  $\leq 4.5$  Å proximity distances from lanifibranor, seladelpar, and elafibranor, and the MolDock scores of their molecular interactions

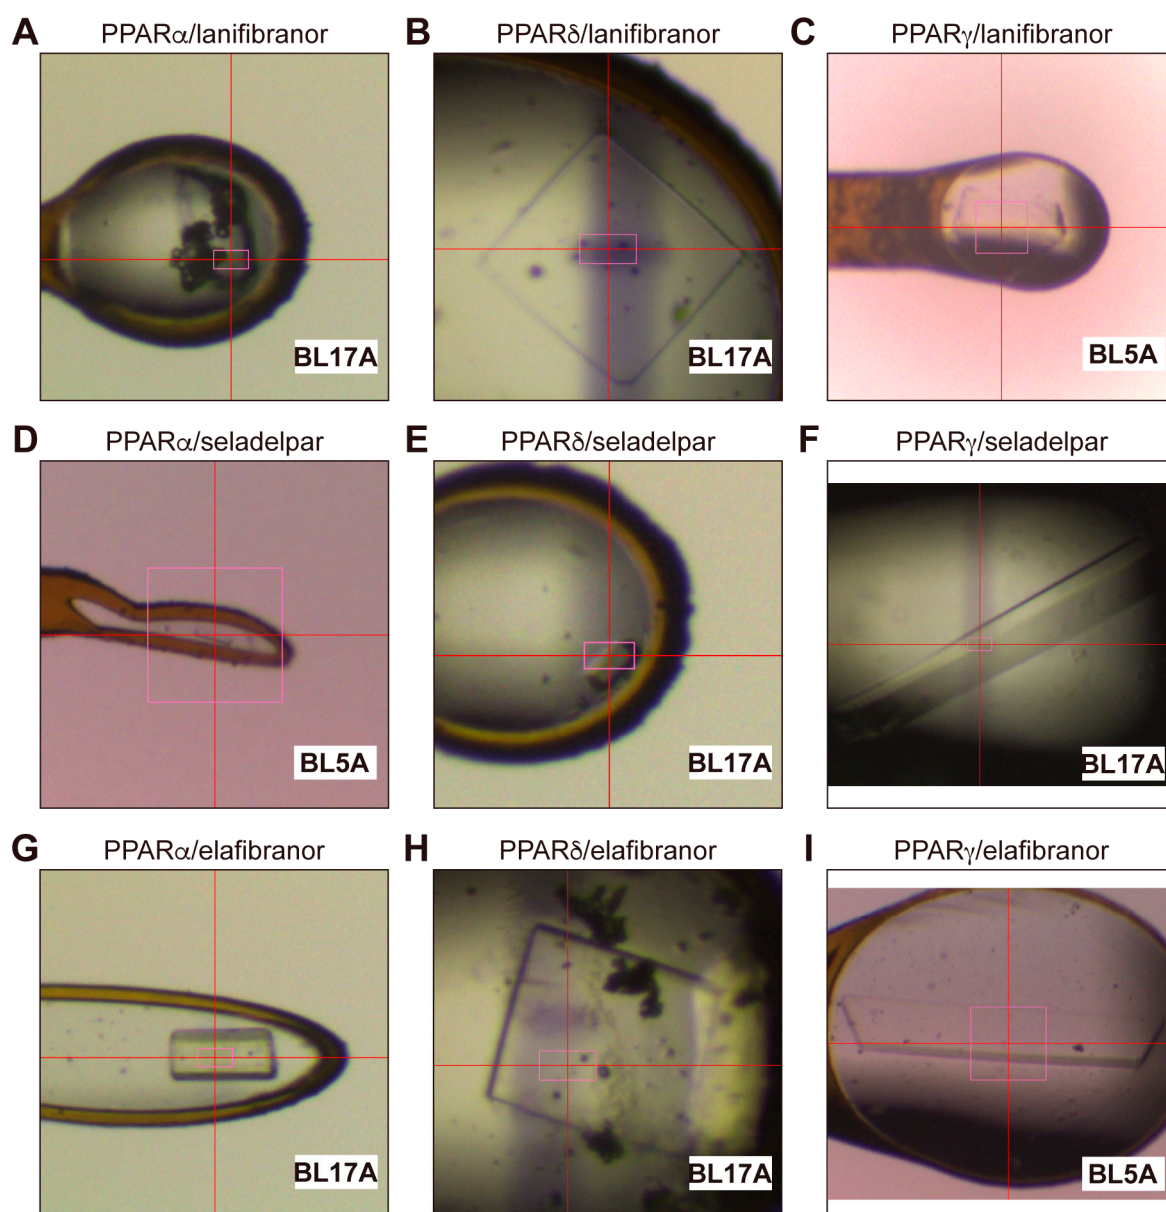

**Figure S1.** Snapshots of the crystals as mounted on the BL5A or BL17A beamline goniometers. Cocrystals of PPAR $\alpha$ / $\delta$ / $\gamma$ -LBD–lanifibranor (A, B, and C, respectively), seladelpar (D, E, and F, respectively), and elafibranor (G, H, and I, respectively; cocrystals with PPAR $\delta$ / $\gamma$ -LBD were not obtained) were analyzed by X-ray diffraction. The sizes of the red square (in BL5A) and rectangular (in BL17A) meshes are 100 $\times$ 100 and 40 $\times$ 20  $\mu$ m, respectively.

**A** PPAR $\alpha$ /lanifibranor (PDB ID: 8HUK)

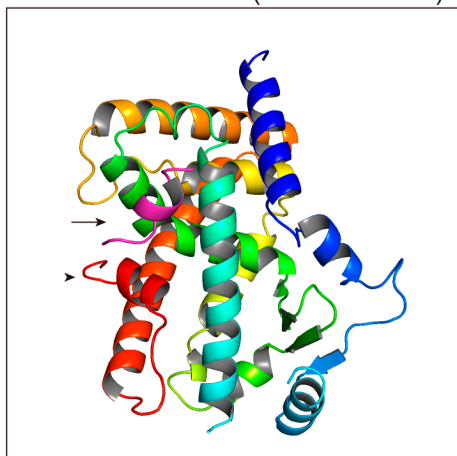

**B** PPAR $\alpha$ /lanifibranor

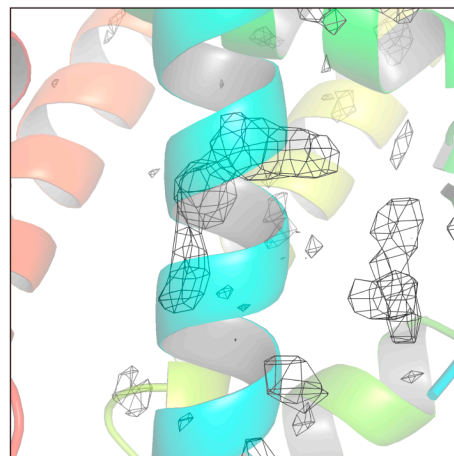

**C** PPAR $\delta$ /lanifibranor (PDB ID: 8HUL)

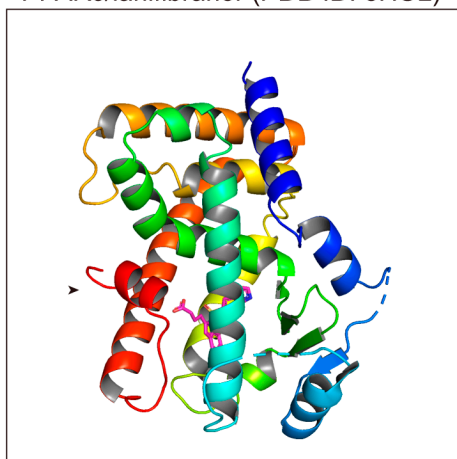

**D** PPAR $\delta$ /lanifibranor

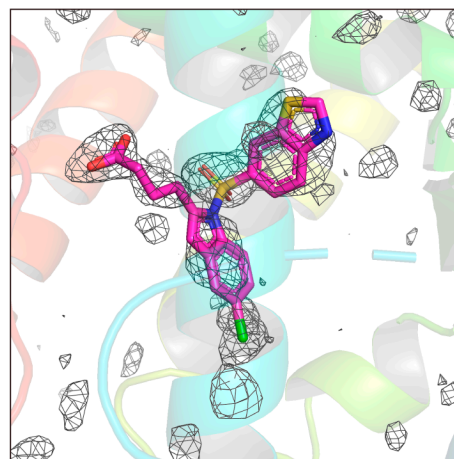

**E** PPAR $\delta$ /seladelpar (PDB ID: 8HUO)

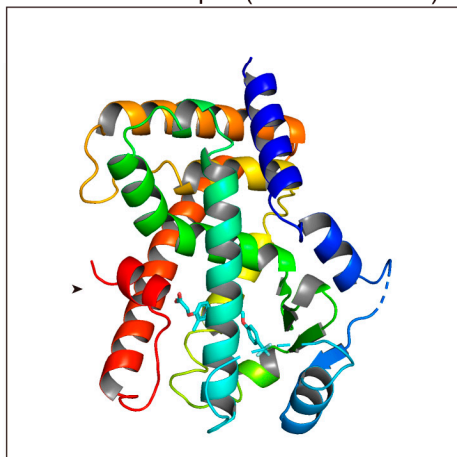

**F** PPAR $\delta$ /seladelpar

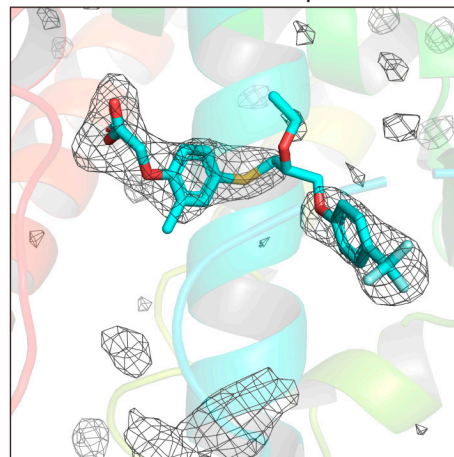

**Figure S2. Other subunit structures of PPAR $\alpha$ / $\delta$  dimers in the cocrystals.** Other subunits of the PPAR $\alpha$ -LBD–lanifibranor cocrystals (**A** and **B**; 8HUK), the PPAR $\delta$ -LBD–lanifibranor cocrystals (**C** and **D**; 8HUL), and the PPAR $\delta$ -LBD–seladelpar cocrystals (**E** and **F**; 8HUO) were revealed by X-ray diffraction. (**A**, **C**, and **E**) The overall structures of the complexes. The SRC1 peptide ( $\alpha$ -helix in magenta) and the AF-2 helix 12 ( $\alpha$ -helix in red) are indicated by arrows and arrowheads, respectively. (**B**, **D**, and **F**) Magnified views of lanifibranor or seladelpar in other subunits of the PPAR $\alpha$ / $\delta$ -LBD. The electron density is shown in the mesh via  $F_o-F_c$  omit maps contoured at  $+3.0\sigma$ .

**Table S1. Data collection and refinement statistics (molecular replacement)**

| Protein                             | hPPAR $\alpha$ -LBD    | hPPAR $\delta$ -LBD    | hPPAR $\gamma$ -LBD    |
|-------------------------------------|------------------------|------------------------|------------------------|
| Peptide                             | SRC1                   | none                   | SRC1                   |
| Binding ligand                      | Lanifibranor           | Lanifibranor           | Lanifibranor           |
| PDB ID                              | 8HUK                   | 8HUL                   | 8HUM                   |
| <b>Data collection</b>              |                        |                        |                        |
| Space group                         | $P2_1$                 | $P2_1$                 | $P2_12_12_1$           |
| Cell dimensions                     |                        |                        |                        |
| $a, b, c$ (Å)                       | 59.73, 101.38, 60.36   | 39.17, 94.95, 96.93    | 49.86, 63.73, 123.48   |
| $\alpha, \beta, \gamma$ (°)         | 90.00, 98.48, 90.00    | 90.00, 97.78, 90.00    | 90.00, 90.00, 90.00    |
| Resolution (Å)                      | 45.48–2.98 (3.16–2.98) | 48.02–2.46 (2.56–2.46) | 46.23–2.29 (2.37–2.29) |
| $R_{\text{merge}}$                  | 0.050 (0.315)          | 0.067 (0.350)          | 0.041 (0.355)          |
| $R_{\text{pim}}$                    | 0.032 (0.211)          | 0.042 (0.217)          | 0.018 (0.150)          |
| $CC_{1/2}$                          | 0.999 (0.949)          | 0.997 (0.916)          | 0.999 (0.984)          |
| $I / \sigma I$                      | 12.3 (3.0)             | 12.3 (3.7)             | 21.6 (3.9)             |
| Completeness (%)                    | 99.3 (98.8)            | 98.9 (97.9)            | 99.8 (99.9)            |
| Redundancy                          | 3.4 (3.1)              | 3.5 (3.5)              | 6.4 (6.5)              |
| <b>Refinement</b>                   |                        |                        |                        |
| Resolution (Å)                      | 39.202–2.981           | 38.805–2.461           | 39.270–2.290           |
| No. reflections                     | 14,434                 | 25,149                 | 18,258                 |
| $R_{\text{work}} / R_{\text{free}}$ | 0.1974/0.2537          | 0.2109/0.2433          | 0.2057/0.2504          |
| No. atoms                           |                        |                        |                        |
| Protein                             | 4,194                  | 4,155                  | 2,327                  |
| Ligand                              | 28                     | 56                     | 28                     |
| Water                               | 0                      | 0                      | 4                      |
| $B$ -factors                        | 100.12                 | 41.56                  | 60.53                  |
| Protein                             | 100.04                 | 41.45                  | 60.51                  |
| Ligand                              | 111.12                 | 49.19                  | 64.08                  |
| Water                               |                        |                        | 48.14                  |
| Ramachandran plot (%)               |                        |                        |                        |
| Favored                             | 93.63                  | 96.41                  | 92.93                  |
| Allowed                             | 5.02                   | 3.39                   | 4.24                   |
| Outliers                            | 1.35                   | 0.20                   | 2.83                   |
| R.m.s. deviations                   |                        |                        |                        |
| Bond lengths (Å)                    | 0.001                  | 0.002                  | 0.008                  |
| Bond angles (°)                     | 0.358                  | 0.42                   | 1.03                   |

Values in parentheses are for highest-resolution shell.

**Table S1.** (Continued)

| Protein                                             | hPPAR $\alpha$ -LBD    | hPPAR $\delta$ -LBD    | hPPAR $\gamma$ -LBD    |
|-----------------------------------------------------|------------------------|------------------------|------------------------|
| Peptide                                             | none                   | none                   | SRC1                   |
| Binding ligand                                      | Seladelpar             | Seladelpar             | Seladelpar             |
| PDB ID                                              | 8HUN                   | 8HUO                   | 8HUP                   |
| <b>Data collection</b>                              |                        |                        |                        |
| Space group                                         | $P2_1$                 | $P2_1$                 | $P2_12_12_1$           |
| Cell dimensions                                     |                        |                        |                        |
| <i>a</i> , <i>b</i> , <i>c</i> (Å)                  | 44.57, 61.51, 53.18    | 39.47, 93.62, 96.67    | 49.81, 64.19, 123.92   |
| $\alpha$ , $\beta$ , $\gamma$ (°)                   | 90.00, 106.29, 90.00   | 90.00, 97.00, 90.00    | 90.00, 90.00, 90.00    |
| Resolution (Å)                                      | 42.78–2.01 (2.06–2.01) | 47.97–2.67 (2.80–2.67) | 46.22–2.36 (2.45–2.36) |
| <i>R</i> <sub>merge</sub>                           | 0.078 (0.354)          | 0.044 (0.289)          | 0.037 (0.377)          |
| <i>R</i> <sub>pim</sub>                             | 0.050 (0.229)          | 0.028 (0.179)          | 0.015 (0.154)          |
| CC <sub>1/2</sub>                                   | 0.997 (0.868)          | 0.999 (0.940)          | 1.000 (0.984)          |
| <i>I</i> / $\sigma I$                               | 11.3 (3.1)             | 18.2 (4.0)             | 28.0 (5.1)             |
| Completeness (%)                                    | 99.8 (99.8)            | 99.5 (99.7)            | 99.9 (99.9)            |
| Redundancy                                          | 3.4 (3.3)              | 3.5 (3.6)              | 6.6 (6.9)              |
| <b>Refinement</b>                                   |                        |                        |                        |
| Resolution (Å)                                      | 42.778–2.010           | 33.504–2.671           | 46.218–2.360           |
| No. reflections                                     | 18,454                 | 19,752                 | 16,945                 |
| <i>R</i> <sub>work</sub> / <i>R</i> <sub>free</sub> | 0.2001/0.2283          | 0.1946/0.2521          | 0.2049/0.2338          |
| No. atoms                                           |                        |                        |                        |
| Protein                                             | 2,150                  | 4,155                  | 2,331                  |
| Ligand                                              | 36                     | 60                     | 30                     |
| Water                                               | 69                     | 0                      | 0                      |
| <i>B</i> -factors                                   | 23.46                  | 56.73                  | 58.56                  |
| Protein                                             | 23.42                  | 56.75                  | 58.32                  |
| Ligand                                              | 29.21                  | 55.75                  | 77.69                  |
| Water                                               | 21.87                  |                        |                        |
| Ramachandran plot (%)                               |                        |                        |                        |
| Favored                                             | 98.43                  | 95.63                  | 92.98                  |
| Allowed                                             | 1.57                   | 3.78                   | 4.91                   |
| Outliers                                            | 0.00                   | 0.60                   | 2.11                   |
| R.m.s. deviations                                   |                        |                        |                        |
| Bond lengths (Å)                                    | 0.003                  | 0.005                  | 0.004                  |
| Bond angles (°)                                     | 0.50                   | 0.72                   | 0.75                   |

Values in parentheses are for highest-resolution shell.

**Table S1.** (Continued)

|                                     |                        |
|-------------------------------------|------------------------|
| Protein                             | hPPAR $\alpha$ -LBD    |
| Peptide                             | SRC1                   |
| Binding ligand                      | Elafibranor            |
| PDB ID                              | 8HUQ                   |
| <b>Data collection</b>              |                        |
| Space group                         | $P2_1$                 |
| Cell dimensions                     |                        |
| <i>a</i> , <i>b</i> , <i>c</i> (Å)  | 44.76, 61.57, 53.35    |
| $\alpha$ , $\beta$ , $\gamma$ (°)   | 90.00, 106.57, 90.00   |
| Resolution (Å)                      | 42.90–1.65 (1.68–1.65) |
| $R_{\text{merge}}$                  | 0.022 (0.393)          |
| $R_{\text{pim}}$                    | 0.014 (0.240)          |
| $CC_{1/2}$                          | 1.000 (0.870)          |
| $I / \sigma I$                      | 17.6 (3.2)             |
| Completeness (%)                    | 95.5 (95.5)            |
| Redundancy                          | 3.5 (3.6)              |
| <b>Refinement</b>                   |                        |
| Resolution (Å)                      | 32.799–1.650           |
| No. reflections                     | 31,930                 |
| $R_{\text{work}} / R_{\text{free}}$ | 0.1864/0.2135          |
| No. atoms                           |                        |
| Protein                             | 2,165                  |
| Ligand                              | 33                     |
| Water                               | 85                     |
| <i>B</i> -factors                   | 34.10                  |
| Protein                             | 33.89                  |
| Ligand                              | 46.38                  |
| Water                               | 34.69                  |
| Ramachandran plot (%)               |                        |
| Favored                             | 97.67                  |
| Allowed                             | 2.33                   |
| Outliers                            | 0.00                   |
| R.m.s. deviations                   |                        |
| Bond lengths (Å)                    | 0.013                  |
| Bond angles (°)                     | 1.26                   |

Values in parentheses are for highest-resolution shell.
